# Supplementary material
Source: PubMed Central journal article supplement (PMC7015714)
Supplement: JB.00675-19-s0001.pdf [file JB.00675-19-s0001.pdf]

**Table S1. Strains and plasmids used in this study**

| Strains                           | Relevant Characteristic(s)                                                         | source     |
|-----------------------------------|------------------------------------------------------------------------------------|------------|
| <i>Nostoc punctiforme</i> strains |                                                                                    |            |
| ATCC 29133                        | wild type                                                                          | ATCC       |
| UCD153                            | Laboratory derivative of <i>N. punctiforme</i> ATCC 29133 with reduced motility    | (1)        |
| TNM620                            | UCD153 with a Tn5-1063 insertion after nucleotide 796 of <i>hrmK</i> (Npun_R3825)* | This study |
| TNM710                            | UCD153 with a Tn5-1063 insertion after nucleotide 757 of <i>hrmK</i>               | This study |
| TNM14194                          | UCD153 with a Tn5-1063 insertion after nucleotide 1713 of <i>hrmK</i>              | This study |
| UOP131                            | $\Delta sigC$ (Npun_F0996)                                                         | This study |
| UOP132                            | $\Delta sigJ$ (Npun_R1337)                                                         | This study |
| UOP139                            | $\Delta hrmK$                                                                      | This study |
| Plasmids                          |                                                                                    |            |
| pAM504                            | Mobilizable shuttle vector                                                         | (2)        |
| pRL278                            | Mobilizable suicide vector                                                         | (3)        |
| pRL1063a                          | Suicide vector carrying Tn5-1063, a Tn5 derivative transposon                      | (4)        |
| pDDR420                           | Suicide vector for in-frame deletion of <i>hrmK</i> [1-4]†                         | This study |
| pDDR456                           | Shuttle vector containing <i>hrmK</i> and 5' intergenic region [5-6]               | This study |

\* locus tag denoted in parentheses

† numbers in brackets correspond to primers used to construct plasmid. Detailed information on primers can be found in Table S2

**Table S2. Oligonucleotides used in this study**

| Oligonucleotide  | Sequence                           | Number | qPCR primer set target gene |
|------------------|------------------------------------|--------|-----------------------------|
| NpR3825-5'-F     | ATATAGGATCCGAATCACTGAGGCAAATAACG   | 1      |                             |
| NpR3825-5'-R     | CTATATTGGCGCTGCTGCATGGTCAACTAG     | 2      |                             |
| NpR3825-3'-F     | CATGCAGCAGCGCCAATATAGAGAGCAGG      | 3      |                             |
| NpR3825-3'-R     | ATATAGAGCTCATCTGTCGTTAACACAAACTC   | 4      |                             |
| PNpR3825-BamHI-F | ATATAGGATCCCATAAGTCTTAAGTTGCTTTCAC | 5      |                             |
| NpR3825-SacI-R   | ATATAGAGCTCCTATATTGGCGGTTTGCTG     | 6      |                             |
| qNpR3825-F2      | TGAAAATCAACAGCCACCAA               | 7      |                             |
| qNpR3825-R2      | AGTTGGCAGACCTGGACATC               | 8      | <i>hrmK</i>                 |
| qNpun_F0996-F2   | GGCGATCGCAACTTCTAGTC               | 9      |                             |
| qNpun_F0996-R2   | ACTTGGGTTCGGTGCATCTC               | 10     | <i>sigC</i>                 |
| qNpun_R1337-F1   | TGAGATGCTGCACTTTTTGC               | 11     |                             |
| qNpun_R1337-R2   | TTTTGAGCGGCTAACTTGGT               | 12     | <i>sigJ</i>                 |
| qNpun_F4811-F2   | TGTTTGGGAGAATTGGTTCC               | 13     |                             |
| qNpun_F4811-R2   | ATCCCGAGATGTTCTGCAAC               | 14     | <i>sigF</i>                 |
| qhfq-F2          | GCTTACCGAATTTGACACCAC              | 15     |                             |
| qhfq-R2          | TGTATGCGATCGCTTGTTTC               | 16     | <i>hfq</i>                  |
| qNpun_R0118-F2   | AATGGTGTCGGCTACAAAGG               | 17     |                             |
| qNpun_R0118-R2   | TCGGCTTCCAAACCAGTATC               | 18     | <i>pilB</i>                 |
| qpilA-F2         | TCTGGTTGCCAACAATGGTA               | 19     |                             |
| qpilA-R2         | ACTTCAGCACTCCGATCACC               | 20     | <i>pilA</i>                 |
| qNpun_F0070-F2   | GGTAGCCAAATTCACCCTGA               | 21     |                             |
| qNpun_F0070-R2   | TTGCCTTGAACCTCTCCCAGT              | 22     | <i>hpsE</i>                 |
| qNpun_r018_F1    | TAAGAGCGCACCAGCAGTAT               | 23     |                             |
| qNpun_r018_R1    | CATTGAGCGGAACTGGTAAA               | 24     | <i>rnpB</i>                 |
| Tn5-seq-F        | CGATGAAGAGCAGAAGTTATC              | 25     |                             |
| Tn5-seq-R        | GGCTCTATTACAGGATAAATC              | 26     |                             |
| Tn5-seq-F-nest   | CGTTACCATGTTAGGAGGTC               | 27     |                             |

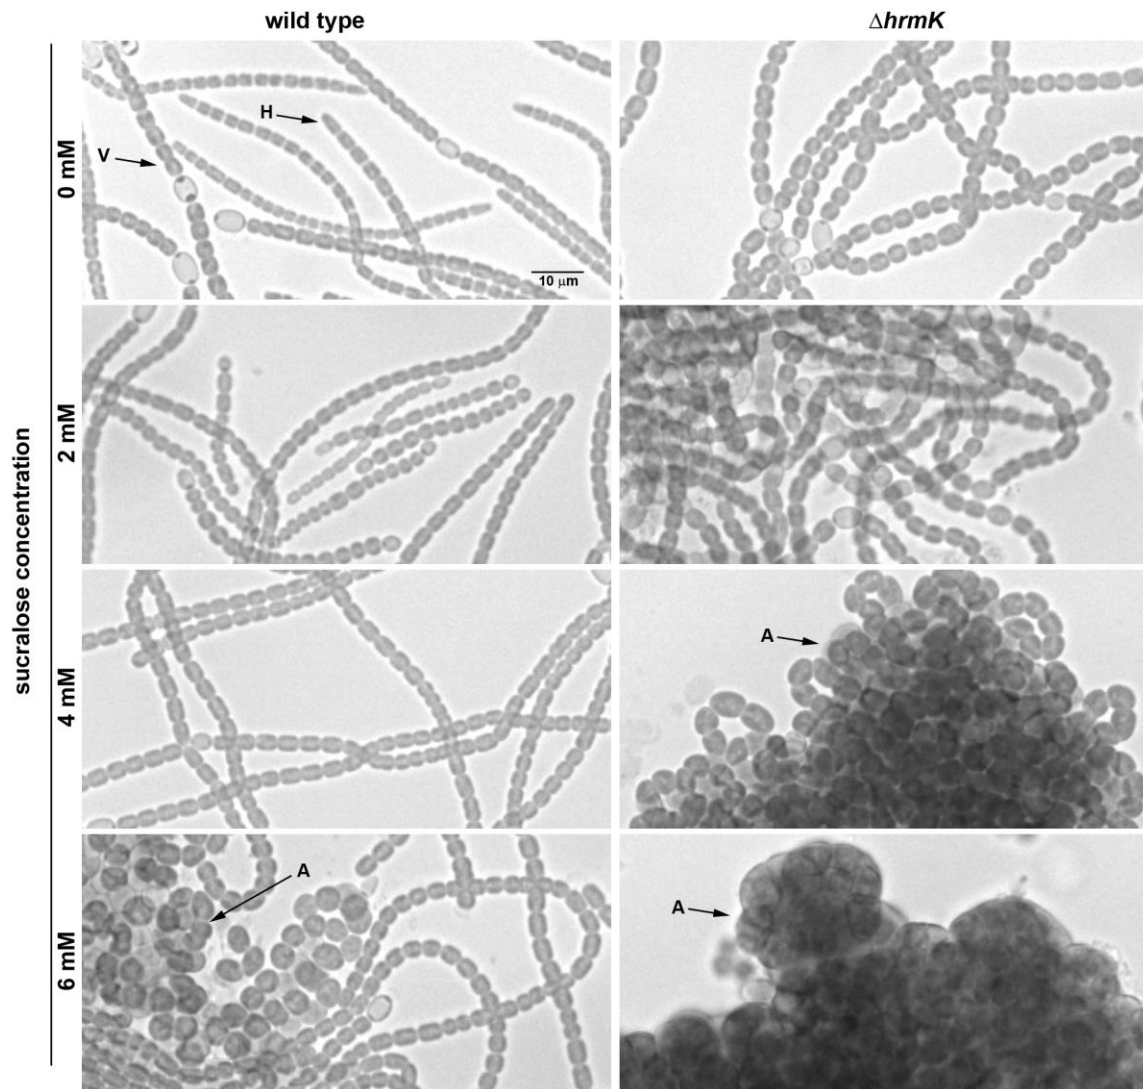

**Figure S1.** The effect of sucralose supplementation on the wild-type and  $\Delta hr m K$  strain. Light micrographs of the wild-type and  $\Delta hr m K$  strains from cultures supplemented with various concentrations of sucralose (as indicated). Examples of a vegetative (V) and hormogonium filaments (H), as well as aseriate colonies (A) are indicated.

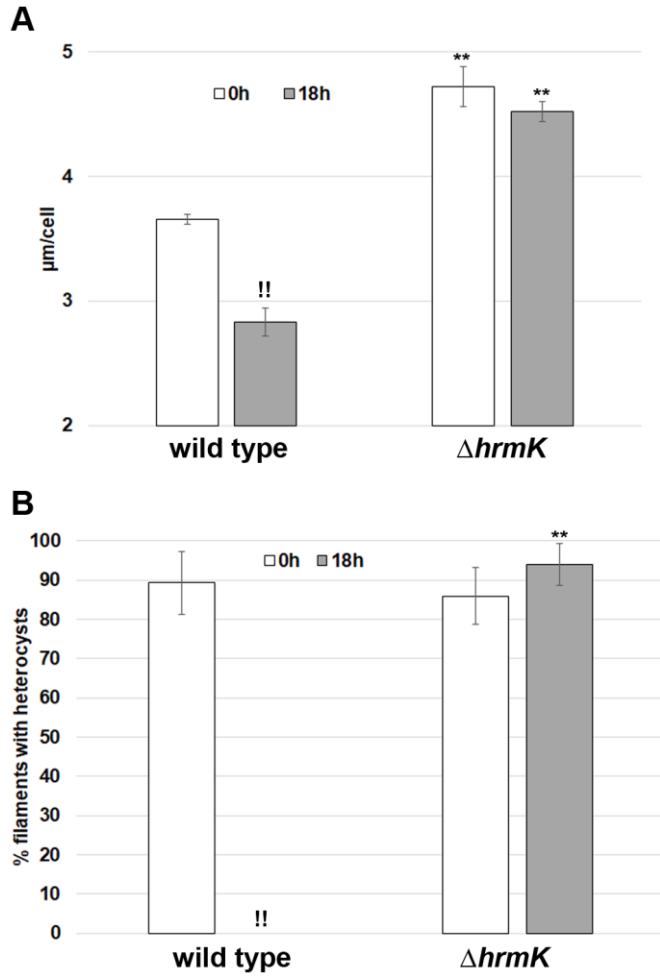

**Figure S2.** Quantitative analysis of hormogonium morphology (cell length and % filaments with heterocysts) in the wild type and  $\Delta hrnK$  strain (n=3, error bars = +/-1 SD) 0 and 18 h post hormogonium induction. **(A)** Average cell length. **(B)** Percentage of filaments containing heterocysts. \* = p-value<0.05, \*\* = p-value<0.01 as determined by two-tailed Student's t-Test between the wild type and  $\Delta hrnK$  strain at the corresponding time point. ! = p-value<0.05, !! = p-value<0.01 as determined by two-tailed Student's t-Test between 0 and 18 h for the same strain.

**SMOV1.** Time lapse microscopy of the wild-type and  $\Delta hrnK$  strains (as indicated).

### Supplemental References Cited

1. Campbell EL, Summers ML, Christman H, Martin ME, Meeks JC. 2007. Global gene expression patterns of *Nostoc punctiforme* in steady-state dinitrogen-grown heterocyst-containing cultures and at single time points during the differentiation of akinetes and hormogonia. *J Bacteriol* 189:5247-5256.
2. Wei TF, Ramasubramanian TS, Golden JW. 1994. *Anabaena* sp. strain PCC 7120 *ntcA* gene required for growth on nitrate and heterocyst development. *J Bacteriol* 176:4473-4482.
3. Cai YP, Wolk CP. 1990. Use of a conditionally lethal gene in *Anabaena* sp. strain PCC 7120 to select for double recombinants and to entrap insertion sequences. *J Bacteriol* 172:3138-3145.
4. Wolk CP, Cai Y, Panoff JM. 1991. Use of a transposon with luciferase as a reporter to identify environmentally responsive genes in a cyanobacterium. *Proceedings of the National Academy of Sciences* 88:5355-5359.
